# Supplementary material for: Immunomodulatory Effect of Marine Cembrane-Type Diterpenoids on Dendritic Cells
Source: MDPI journal article supplement (doi:10.3390/md11041336), 2013-04-22
Supplement: s1 [file s1]

marinedrugs-11-01336-s001.mol
  corina  04151405283D 1   1.00000     0.00000 
CORINA 3.49 0023  12.04.2013
 25 26  0  0  0  0  0  0  0  0999 V2000
   -0.2110    1.1560    0.2289 C   0  0  0  0  0  0  0  0  0  0  0  0
   -0.4441   -0.3531    0.1318 C   0  0  0  0  0  0  0  0  0  0  0  0
   -2.7097    0.6992   -0.5971 C   0  0  0  0  0  0  0  0  0  0  0  0
   -2.8726   -0.0144    0.7214 C   0  0  0  0  0  0  0  0  0  0  0  0
   -1.5728   -0.7542    1.0822 C   0  0  0  0  0  0  0  0  0  0  0  0
    1.2874    1.4338    0.3631 C   0  0  0  0  0  0  0  0  0  0  0  0
   -3.2740    1.8651   -0.7882 C   0  0  0  0  0  0  0  0  0  0  0  0
    1.7723    2.2192   -0.8577 C   0  0  0  0  0  0  0  0  0  0  0  0
    1.9107    3.6987   -0.4903 C   0  0  0  0  0  0  0  0  0  0  0  0
   -3.1131    2.5701   -2.1103 C   0  0  0  0  0  0  0  0  0  0  0  0
   -2.6542    4.0087   -1.8704 C   0  0  0  0  0  0  0  0  0  0  0  0
   -1.1803    4.1195   -2.1637 C   0  0  0  0  0  0  0  0  0  0  0  0
    1.1296    4.5462   -1.4967 C   0  0  0  0  0  0  0  0  0  0  0  0
   -0.3451    4.4366   -1.2059 C   0  0  0  0  0  0  0  0  0  0  0  0
   -0.8587    4.6913    0.1876 C   0  0  0  0  0  0  0  0  0  0  0  0
    0.7760    2.0709   -1.9786 C   0  0  0  0  0  0  0  0  0  0  0  0
    1.5260    2.1981    1.5467 O   0  0  0  0  0  0  0  0  0  0  0  0
   -4.0833    2.5025    0.3119 C   0  0  0  0  0  0  0  0  0  0  0  0
   -1.9254   -2.2188    0.9092 C   0  0  0  0  0  0  0  0  0  0  0  0
   -3.9016   -1.0340    0.6002 O   0  0  0  0  0  0  0  0  0  0  0  0
   -3.3722   -2.2638    0.6585 C   0  0  0  0  0  0  0  0  0  0  0  0
   -1.0921   -3.2546    0.9714 C   0  0  0  0  0  0  0  0  0  0  0  0
   -4.0099   -3.2891    0.5205 O   0  0  0  0  0  0  0  0  0  0  0  0
    1.1922    1.4281   -3.2765 C   0  0  0  0  0  0  0  0  0  0  0  0
   -0.3558    2.4673   -1.8367 O   0  0  0  0  0  0  0  0  0  0  0  0
  1  2  1  0      
  3  4  1  0      
  4  5  1  0      
  5  2  1  0      
  1  6  1  0      
  3  7  2  0      
  6  8  1  0      
  8  9  1  0      
  7 10  1  0      
 10 11  1  0      
 11 12  1  0      
  9 13  1  0      
 13 14  1  0      
 12 14  2  0      
 14 15  1  0      
  8 16  1  0      
  6 17  1  0      
  7 18  1  0      
  5 19  1  0      
  4 20  1  0      
 19 21  1  0      
 20 21  1  0      
 19 22  2  0      
 21 23  2  0      
 16 24  1  0      
 16 25  2  0      
M  END
$$$$
