# Supplementary material for: Immunomodulatory Effect of Marine Cembrane-Type Diterpenoids on Dendritic Cells
Source: MDPI journal article supplement (doi:10.3390/md11041336), 2013-04-22
Supplement: s2 [file s2]

marinedrugs-11-01336-s001.mol
  ChemDraw03101421082D

 25 26  0  0  0  0  0  0  0  0999 V2000
   -0.1819    0.5288    0.0000 C   0  0  0  0  0  0  0  0  0  0  0  0
    0.6431    0.5288    0.0000 C   0  0  0  0  0  0  0  0  0  0  0  0
   -0.1819   -0.9001    0.0000 C   0  0  0  0  0  0  0  0  0  0  0  0
    0.6431   -0.9001    0.0000 C   0  0  0  0  0  0  0  0  0  0  0  0
    1.0556   -0.1856    0.0000 C   0  0  0  0  0  0  0  0  0  0  0  0
   -0.7652    1.1122    0.0000 C   0  0  0  0  0  0  0  0  0  0  0  0
   -0.8964   -1.3126    0.0000 C   0  0  0  0  0  0  0  0  0  0  0  0
   -1.6050    0.9001    0.0000 C   0  0  0  0  0  0  0  0  0  0  0  0
   -2.3063    1.3745    0.0000 C   0  0  0  0  0  0  0  0  0  0  0  0
   -1.7288   -0.9768    0.0000 C   0  0  0  0  0  0  0  0  0  0  0  0
   -2.4506   -1.3480    0.0000 C   0  0  0  0  0  0  0  0  0  0  0  0
   -3.0900   -0.7087    0.0000 C   0  0  0  0  0  0  0  0  0  0  0  0
   -3.0488    0.6320    0.0000 C   0  0  0  0  0  0  0  0  0  0  0  0
   -2.5744    0.0338    0.0000 C   0  0  0  0  0  0  0  0  0  0  0  0
   -1.7494    0.0338    0.0000 C   0  0  0  0  0  0  0  0  0  0  0  0
   -1.6050    1.7251    0.0000 C   0  0  0  0  0  0  0  0  0  0  0  0
   -0.5517    1.9091    0.0000 O   0  0  0  0  0  0  0  0  0  0  0  0
   -0.8964   -2.1376    0.0000 C   0  0  0  0  0  0  0  0  0  0  0  0
    1.8806   -0.1856    0.0000 C   0  0  0  0  0  0  0  0  0  0  0  0
    1.3576   -1.3126    0.0000 O   0  0  0  0  0  0  0  0  0  0  0  0
    2.2931   -0.9001    0.0000 C   0  0  0  0  0  0  0  0  0  0  0  0
    2.2931    0.5288    0.0000 C   0  0  0  0  0  0  0  0  0  0  0  0
    3.0900   -1.1136    0.0000 O   0  0  0  0  0  0  0  0  0  0  0  0
   -0.8905    2.1376    0.0000 C   0  0  0  0  0  0  0  0  0  0  0  0
   -2.3195    2.1376    0.0000 O   0  0  0  0  0  0  0  0  0  0  0  0
  1  2  1  0      
  3  4  1  0      
  4  5  1  0      
  5  2  1  0      
  1  6  1  0      
  3  7  2  0      
  6  8  1  0      
  8  9  1  0      
  7 10  1  0      
 10 11  1  0      
 11 12  1  0      
  9 13  1  0      
 13 14  1  0      
 12 14  2  0      
 14 15  1  0      
  8 16  1  1      
  6 17  1  1      
  7 18  1  0      
  5 19  1  6      
  4 20  1  6      
 19 21  1  0      
 20 21  1  0      
 19 22  2  0      
 21 23  2  0      
 16 24  1  0      
 16 25  2  0      
M  END
