# Supplementary material for: Immunomodulatory Effect of Marine Cembrane-Type Diterpenoids on Dendritic Cells
Source: MDPI journal article supplement (doi:10.3390/md11041336), 2013-04-22
Supplement: s3 [file s3]

marinedrugs-11-01336-s002.mol
  corina  04151405283D 1   1.00000     0.00000 
CORINA 3.49 0023  12.04.2013
 28 29  0  0  0  0  0  0  0  0999 V2000
   -0.2111    1.1561    0.2288 C   0  0  0  0  0  0  0  0  0  0  0  0
   -0.4442   -0.3530    0.1317 C   0  0  0  0  0  0  0  0  0  0  0  0
   -2.7098    0.6993   -0.5971 C   0  0  0  0  0  0  0  0  0  0  0  0
   -2.8727   -0.0143    0.7213 C   0  0  0  0  0  0  0  0  0  0  0  0
   -1.5729   -0.7541    1.0821 C   0  0  0  0  0  0  0  0  0  0  0  0
    1.2874    1.4338    0.3630 C   0  0  0  0  0  0  0  0  0  0  0  0
   -3.2741    1.8653   -0.7883 C   0  0  0  0  0  0  0  0  0  0  0  0
    1.7723    2.2191   -0.8577 C   0  0  0  0  0  0  0  0  0  0  0  0
    1.9107    3.6987   -0.4902 C   0  0  0  0  0  0  0  0  0  0  0  0
   -3.1131    2.5702   -2.1103 C   0  0  0  0  0  0  0  0  0  0  0  0
   -2.6542    4.0089   -1.8704 C   0  0  0  0  0  0  0  0  0  0  0  0
   -1.1802    4.1196   -2.1637 C   0  0  0  0  0  0  0  0  0  0  0  0
    1.1297    4.5462   -1.4967 C   0  0  0  0  0  0  0  0  0  0  0  0
   -0.3451    4.4366   -1.2058 C   0  0  0  0  0  0  0  0  0  0  0  0
   -0.8586    4.6914    0.1876 C   0  0  0  0  0  0  0  0  0  0  0  0
    0.7760    2.0710   -1.9786 C   0  0  0  0  0  0  0  0  0  0  0  0
   -4.0833    2.5027    0.3118 C   0  0  0  0  0  0  0  0  0  0  0  0
   -1.9256   -2.2187    0.9091 C   0  0  0  0  0  0  0  0  0  0  0  0
   -3.9017   -1.0338    0.6001 O   0  0  0  0  0  0  0  0  0  0  0  0
   -3.3724   -2.2637    0.6584 C   0  0  0  0  0  0  0  0  0  0  0  0
   -1.0923   -3.2546    0.9713 C   0  0  0  0  0  0  0  0  0  0  0  0
   -4.0101   -3.2890    0.5203 O   0  0  0  0  0  0  0  0  0  0  0  0
    1.1922    1.4282   -3.2766 C   0  0  0  0  0  0  0  0  0  0  0  0
   -0.3558    2.4673   -1.8367 O   0  0  0  0  0  0  0  0  0  0  0  0
    1.5298    2.2104    1.5657 O   0  0  0  0  0  0  0  0  0  0  0  0
    1.7641    0.3176    2.6819 O   0  0  0  0  0  0  0  0  0  0  0  0
    1.7628    1.5258    2.6965 C   0  0  0  0  0  0  0  0  0  0  0  0
    2.0227    2.2640    3.9843 C   0  0  0  0  0  0  0  0  0  0  0  0
  1  2  1  0      
  3  4  1  0      
  4  5  1  0      
  5  2  1  0      
  1  6  1  0      
  3  7  2  0      
  6  8  1  0      
  8  9  1  0      
  7 10  1  0      
 10 11  1  0      
 11 12  1  0      
  9 13  1  0      
 13 14  1  0      
 12 14  2  0      
 14 15  1  0      
  8 16  1  0      
  7 17  1  0      
  5 18  1  0      
  4 19  1  0      
 18 20  1  0      
 19 20  1  0      
 18 21  2  0      
 20 22  2  0      
 16 23  1  0      
 16 24  2  0      
  6 25  1  0      
 25 27  1  0      
 26 27  2  0      
 27 28  1  0      
M  STY  1   1 SUP
M  SLB  1   1   1
M  SAL   1  4  25  26  27  28
M  SBL   1  1  26
M  SMT   1 OAc
M  SBV   1 26   -8.1255    5.7155
M  END
$$$$
