# Supplementary material for: Immunomodulatory Effect of Marine Cembrane-Type Diterpenoids on Dendritic Cells
Source: MDPI journal article supplement (doi:10.3390/md11041336), 2013-04-22
Supplement: s4 [file s4]

marinedrugs-11-01336-s002.mol
  ChemDraw03101421092D

 28 29  0  0  0  0  0  0  0  0999 V2000
   -0.1819    0.2054    0.0000 C   0  0  0  0  0  0  0  0  0  0  0  0
    0.6431    0.2054    0.0000 C   0  0  0  0  0  0  0  0  0  0  0  0
   -0.1819   -1.2235    0.0000 C   0  0  0  0  0  0  0  0  0  0  0  0
    0.6431   -1.2235    0.0000 C   0  0  0  0  0  0  0  0  0  0  0  0
    1.0556   -0.5090    0.0000 C   0  0  0  0  0  0  0  0  0  0  0  0
   -0.7652    0.7888    0.0000 C   0  0  0  0  0  0  0  0  0  0  0  0
   -0.8964   -1.6360    0.0000 C   0  0  0  0  0  0  0  0  0  0  0  0
   -1.6050    0.5767    0.0000 C   0  0  0  0  0  0  0  0  0  0  0  0
   -2.3063    1.0511    0.0000 C   0  0  0  0  0  0  0  0  0  0  0  0
   -1.7288   -1.3002    0.0000 C   0  0  0  0  0  0  0  0  0  0  0  0
   -2.4506   -1.6714    0.0000 C   0  0  0  0  0  0  0  0  0  0  0  0
   -3.0900   -1.0321    0.0000 C   0  0  0  0  0  0  0  0  0  0  0  0
   -3.0488    0.3086    0.0000 C   0  0  0  0  0  0  0  0  0  0  0  0
   -2.5744   -0.2896    0.0000 C   0  0  0  0  0  0  0  0  0  0  0  0
   -1.7494   -0.2896    0.0000 C   0  0  0  0  0  0  0  0  0  0  0  0
   -1.6050    1.4017    0.0000 C   0  0  0  0  0  0  0  0  0  0  0  0
   -0.8964   -2.4610    0.0000 C   0  0  0  0  0  0  0  0  0  0  0  0
    1.8806   -0.5090    0.0000 C   0  0  0  0  0  0  0  0  0  0  0  0
    1.3576   -1.6360    0.0000 O   0  0  0  0  0  0  0  0  0  0  0  0
    2.2931   -1.2235    0.0000 C   0  0  0  0  0  0  0  0  0  0  0  0
    2.2931    0.2054    0.0000 C   0  0  0  0  0  0  0  0  0  0  0  0
    3.0900   -1.4370    0.0000 O   0  0  0  0  0  0  0  0  0  0  0  0
   -0.8905    1.8142    0.0000 C   0  0  0  0  0  0  0  0  0  0  0  0
   -2.3195    1.8142    0.0000 O   0  0  0  0  0  0  0  0  0  0  0  0
   -1.0570    1.0807    0.0000 O   0  0  0  0  0  0  0  0  0  0  0  0
   -2.4372    1.4506    0.0000 O   0  0  0  0  0  0  0  0  0  0  0  0
   -1.6403    1.6641    0.0000 C   0  0  0  0  0  0  0  0  0  0  0  0
   -1.4268    2.4610    0.0000 C   0  0  0  0  0  0  0  0  0  0  0  0
  1  2  1  0      
  3  4  1  0      
  4  5  1  0      
  5  2  1  0      
  1  6  1  0      
  3  7  2  0      
  6  8  1  0      
  8  9  1  0      
  7 10  1  0      
 10 11  1  0      
 11 12  1  0      
  9 13  1  0      
 13 14  1  0      
 12 14  2  0      
 14 15  1  0      
  8 16  1  1      
  7 17  1  0      
  5 18  1  6      
  4 19  1  6      
 18 20  1  0      
 19 20  1  0      
 18 21  2  0      
 20 22  2  0      
 16 23  1  0      
 16 24  2  0      
  6 25  1  1      
 25 27  1  0      
 26 27  2  0      
 27 28  1  0      
M  STY  1   1 SUP
M  SLB  1   1   1
M  SAL   1  4  25  26  27  28
M  SBL   1  1  26
M  SMT   1 OAc
M  SBV   1 26   -8.1255    5.7155
M  END
