# Supplementary material for: Immunomodulatory Effect of Marine Cembrane-Type Diterpenoids on Dendritic Cells
Source: MDPI journal article supplement (doi:10.3390/md11041336), 2013-04-22
Supplement: s5 [file s5]

marinedrugs-11-01336-s003.mol
  corina  04151405283D 1   1.00000     0.00000 
CORINA 3.49 0023  12.04.2013
 23 24  0  0  0  0  0  0  0  0999 V2000
    0.0892    1.6326   -0.1615 C   0  0  0  0  0  0  0  0  0  0  0  0
    2.1331    4.1311   -2.8197 C   0  0  0  0  0  0  0  0  0  0  0  0
    0.9740    3.9506   -1.8373 C   0  0  0  0  0  0  0  0  0  0  0  0
    0.0883    0.1110   -0.0003 C   0  0  0  0  0  0  0  0  0  0  0  0
    1.7823    3.4875   -4.1362 C   0  0  0  0  0  0  0  0  0  0  0  0
    1.0904   -0.5055   -0.9784 C   0  0  0  0  0  0  0  0  0  0  0  0
    0.3419   -1.0721   -2.1865 C   0  0  0  0  0  0  0  0  0  0  0  0
    2.2982    2.3265   -4.4555 C   0  0  0  0  0  0  0  0  0  0  0  0
    1.9486    1.6839   -5.7732 C   0  0  0  0  0  0  0  0  0  0  0  0
    1.6773    0.1936   -5.5576 C   0  0  0  0  0  0  0  0  0  0  0  0
    1.1785   -0.8892   -3.4266 C   0  0  0  0  0  0  0  0  0  0  0  0
    0.8409    0.0099   -4.3175 C   0  0  0  0  0  0  0  0  0  0  0  0
   -0.3840    0.8612   -4.1021 C   0  0  0  0  0  0  0  0  0  0  0  0
    0.8386    4.1797   -5.0857 C   0  0  0  0  0  0  0  0  0  0  0  0
    0.4592   -0.2265    1.3378 O   0  0  0  0  0  0  0  0  0  0  0  0
   -1.3115   -0.4322   -0.2942 C   0  0  0  0  0  0  0  0  0  0  0  0
    1.5290    3.6492   -0.4443 C   0  0  0  0  0  0  0  0  0  0  0  0
    1.5318    2.1352   -0.2076 C   0  0  0  0  0  0  0  0  0  0  0  0
   -0.6209    2.2333    0.9451 O   0  0  0  0  0  0  0  0  0  0  0  0
   -0.3777    3.5084    1.2768 C   0  0  0  0  0  0  0  0  0  0  0  0
    0.6570    4.2997    0.6014 C   0  0  0  0  0  0  0  0  0  0  0  0
    0.8259    5.5832    0.9096 C   0  0  0  0  0  0  0  0  0  0  0  0
   -1.0326    4.0241    2.1613 O   0  0  0  0  0  0  0  0  0  0  0  0
  2  3  1  0      
  1  4  1  0      
  2  5  1  0      
  4  6  1  0      
  6  7  1  0      
  5  8  2  0      
  8  9  1  0      
  9 10  1  0      
  7 11  1  0      
 11 12  2  0      
 10 12  1  0      
 12 13  1  0      
  5 14  1  0      
  4 15  1  0      
  4 16  1  0      
  3 17  1  0      
  1 18  1  0      
 18 17  1  0      
  1 19  1  0      
 19 20  1  0      
 17 21  1  0      
 21 20  1  0      
 21 22  2  0      
 20 23  2  0      
M  END
$$$$
