# Supplementary material for: Immunomodulatory Effect of Marine Cembrane-Type Diterpenoids on Dendritic Cells
Source: MDPI journal article supplement (doi:10.3390/md11041336), 2013-04-22
Supplement: s7 [file s7]

marinedrugs-11-01336-s004.mol
  corina  04151405283D 1   1.00000     0.00000 
CORINA 3.49 0023  12.04.2013
 23 24  0  0  0  0  0  0  0  0999 V2000
   -0.0055    1.5245    0.0166 C   0  0  0  0  0  0  0  0  0  0  0  0
    4.2389    1.2511   -1.9891 C   0  0  0  0  0  0  0  0  0  0  0  0
    2.7563    0.9597   -1.7355 C   0  0  0  0  0  0  0  0  0  0  0  0
    0.0021   -0.0041    0.0020 C   0  0  0  0  0  0  0  0  0  0  0  0
    5.0206   -0.0349   -1.8514 C   0  0  0  0  0  0  0  0  0  0  0  0
    0.7532   -0.5425    1.2163 C   0  0  0  0  0  0  0  0  0  0  0  0
    1.2718   -1.9600    0.9519 C   0  0  0  0  0  0  0  0  0  0  0  0
    4.8818   -0.7503   -0.7656 C   0  0  0  0  0  0  0  0  0  0  0  0
    5.6094   -2.0520   -0.5700 C   0  0  0  0  0  0  0  0  0  0  0  0
    5.0199   -2.7890    0.6371 C   0  0  0  0  0  0  0  0  0  0  0  0
    2.7727   -1.9571    1.0567 C   0  0  0  0  0  0  0  0  0  0  0  0
    3.5184   -2.8716    0.4961 C   0  0  0  0  0  0  0  0  0  0  0  0
    2.9107   -4.0109   -0.2793 C   0  0  0  0  0  0  0  0  0  0  0  0
    5.9456   -0.4651   -2.9580 C   0  0  0  0  0  0  0  0  0  0  0  0
    0.5774   -0.4835   -1.2107 O   0  0  0  0  0  0  0  0  0  0  0  0
    2.0345    2.2503   -1.3536 C   0  0  0  0  0  0  0  0  0  0  0  0
    1.3791    2.1277    0.0140 C   0  0  0  0  0  0  0  0  0  0  0  0
   -0.8619    2.0186   -1.0263 O   0  0  0  0  0  0  0  0  0  0  0  0
   -0.3897    2.5110   -2.1700 C   0  0  0  0  0  0  0  0  0  0  0  0
    1.0497    2.6404   -2.4202 C   0  0  0  0  0  0  0  0  0  0  0  0
    1.4774    3.1112   -3.5946 C   0  0  0  0  0  0  0  0  0  0  0  0
   -1.1717    2.8631   -3.0325 O   0  0  0  0  0  0  0  0  0  0  0  0
   -1.4553   -0.4935    0.0741 C   0  0  0  0  0  0  0  0  0  0  0  0
  2  3  1  0      
  1  4  1  0      
  2  5  1  0      
  4  6  1  0      
  6  7  1  0      
  5  8  2  0      
  8  9  1  0      
  9 10  1  0      
  7 11  1  0      
 11 12  2  0      
 10 12  1  0      
 12 13  1  0      
  5 14  1  0      
  4 15  1  0      
  3 16  1  0      
  1 17  1  0      
 17 16  1  0      
 18 19  1  0      
 16 20  1  0      
 20 19  1  0      
 20 21  2  0      
 19 22  2  0      
  4 23  1  0      
  1 18  1  0      
M  END
$$$$
