# Supplementary material for: Immunomodulatory Effect of Marine Cembrane-Type Diterpenoids on Dendritic Cells
Source: MDPI journal article supplement (doi:10.3390/md11041336), 2013-04-22
Supplement: s8 [file s8]

marinedrugs-11-01336-s004.mol
  ChemDraw03101421102D

 23 24  0  0  0  0  0  0  0  0999 V2000
    0.2858    0.8184    0.0000 C   0  0  0  0  0  0  0  0  0  0  0  0
    0.0796   -0.6048    0.0000 C   0  0  0  0  0  0  0  0  0  0  0  0
    0.9046   -0.4604    0.0000 C   0  0  0  0  0  0  0  0  0  0  0  0
   -0.4007    1.1336    0.0000 C   0  0  0  0  0  0  0  0  0  0  0  0
   -0.5318   -1.2912    0.0000 C   0  0  0  0  0  0  0  0  0  0  0  0
   -1.2404    0.9215    0.0000 C   0  0  0  0  0  0  0  0  0  0  0  0
   -1.9417    1.3959    0.0000 C   0  0  0  0  0  0  0  0  0  0  0  0
   -1.3642   -0.9554    0.0000 C   0  0  0  0  0  0  0  0  0  0  0  0
   -2.0861   -1.3266    0.0000 C   0  0  0  0  0  0  0  0  0  0  0  0
   -2.7254   -0.6873    0.0000 C   0  0  0  0  0  0  0  0  0  0  0  0
   -2.6842    0.6534    0.0000 C   0  0  0  0  0  0  0  0  0  0  0  0
   -2.2098    0.0552    0.0000 C   0  0  0  0  0  0  0  0  0  0  0  0
   -1.3848    0.0552    0.0000 C   0  0  0  0  0  0  0  0  0  0  0  0
   -0.5318   -2.1162    0.0000 C   0  0  0  0  0  0  0  0  0  0  0  0
    0.0118    1.8481    0.0000 O   0  0  0  0  0  0  0  0  0  0  0  0
    1.3171    0.1996    0.0000 C   0  0  0  0  0  0  0  0  0  0  0  0
    0.4096    0.2821    0.0000 C   0  0  0  0  0  0  0  0  0  0  0  0
    0.6983    1.5328    0.0000 O   0  0  0  0  0  0  0  0  0  0  0  0
    1.5233    1.5328    0.0000 C   0  0  0  0  0  0  0  0  0  0  0  0
    1.9004    0.7830    0.0000 C   0  0  0  0  0  0  0  0  0  0  0  0
    2.7254    0.7830    0.0000 C   0  0  0  0  0  0  0  0  0  0  0  0
    2.1067    2.1162    0.0000 O   0  0  0  0  0  0  0  0  0  0  0  0
   -0.9840    1.7170    0.0000 C   0  0  0  0  0  0  0  0  0  0  0  0
  2  3  1  0      
  1  4  1  0      
  2  5  1  0      
  4  6  1  0      
  6  7  1  0      
  5  8  2  0      
  8  9  1  0      
  9 10  1  0      
  7 11  1  0      
 11 12  2  0      
 10 12  1  0      
 12 13  1  0      
  5 14  1  0      
  4 15  1  6      
  3 16  1  0      
  1 17  1  0      
 17 16  1  0      
 18 19  1  0      
 16 20  1  6      
 20 19  1  0      
 20 21  2  0      
 19 22  2  0      
  4 23  1  1      
  1 18  1  6      
M  END
