# Supplementary material for: Immunomodulatory Effect of Marine Cembrane-Type Diterpenoids on Dendritic Cells
Source: MDPI journal article supplement (doi:10.3390/md11041336), 2013-04-22
Supplement: s9 [file s9]

marinedrugs-11-01336-s005.mol
  corina  04151405293D 1   1.00000     0.00000 
CORINA 3.49 0023  12.04.2013
 24 26  0  0  0  0  0  0  0  0999 V2000
   -0.0129    1.5080    0.0059 C   0  0  0  0  0  0  0  0  0  0  0  0
    0.0086   -0.0004   -0.0042 C   0  0  0  0  0  0  0  0  0  0  0  0
   -1.1121    1.0768    2.5666 C   0  0  0  0  0  0  0  0  0  0  0  0
   -1.9866    0.5695    1.4516 C   0  0  0  0  0  0  0  0  0  0  0  0
   -1.2532   -0.5255    0.6817 C   0  0  0  0  0  0  0  0  0  0  0  0
    1.0973    2.2019    0.0009 C   0  0  0  0  0  0  0  0  0  0  0  0
   -1.7060    1.9283    3.6596 C   0  0  0  0  0  0  0  0  0  0  0  0
    1.0286    3.7088    0.0276 C   0  0  0  0  0  0  0  0  0  0  0  0
    1.6883    4.2077    1.3201 C   0  0  0  0  0  0  0  0  0  0  0  0
   -1.8201    3.4501    3.3983 C   0  0  0  0  0  0  0  0  0  0  0  0
   -1.6045    4.3737    4.5770 C   0  0  0  0  0  0  0  0  0  0  0  0
   -0.4831    5.3804    4.2873 C   0  0  0  0  0  0  0  0  0  0  0  0
    0.6142    4.9131    2.1339 C   0  0  0  0  0  0  0  0  0  0  0  0
    0.6042    4.7319    3.4525 C   0  0  0  0  0  0  0  0  0  0  0  0
    1.6911    3.8901    4.0957 C   0  0  0  0  0  0  0  0  0  0  0  0
    2.4306    1.5273   -0.0880 C   0  0  0  0  0  0  0  0  0  0  0  0
    0.0636    0.8017    2.5858 O   0  0  0  0  0  0  0  0  0  0  0  0
   -1.4118    1.4767    5.0871 C   0  0  0  0  0  0  0  0  0  0  0  0
   -2.0975   -1.0871   -0.4583 C   0  0  0  0  0  0  0  0  0  0  0  0
   -1.2355   -1.0568   -1.6357 C   0  0  0  0  0  0  0  0  0  0  0  0
   -0.0355   -0.4973   -1.3788 O   0  0  0  0  0  0  0  0  0  0  0  0
   -3.3558   -1.5152   -0.3927 C   0  0  0  0  0  0  0  0  0  0  0  0
   -1.5620   -1.4875   -2.7243 O   0  0  0  0  0  0  0  0  0  0  0  0
   -2.9389    2.5730    3.4228 O   0  0  0  0  0  0  0  0  0  0  0  0
  1  2  1  0      
  3  4  1  0      
  4  5  1  0      
  5  2  1  0      
  1  6  2  0      
  3  7  1  0      
  6  8  1  0      
  8  9  1  0      
  7 10  1  0      
 10 11  1  0      
 11 12  1  0      
  9 13  1  0      
 13 14  2  0      
 12 14  1  0      
 14 15  1  0      
  6 16  1  0      
  3 17  2  0      
  7 18  1  0      
 19 20  1  0      
 20 21  1  0      
  2 21  1  0      
  5 19  1  0      
 19 22  2  0      
 20 23  2  0      
 10 24  1  0      
  7 24  1  0      
M  END
$$$$
