# Supplementary material for: Immunomodulatory Effect of Marine Cembrane-Type Diterpenoids on Dendritic Cells
Source: MDPI journal article supplement (doi:10.3390/md11041336), 2013-04-22
Supplement: s10 [file s10]

marinedrugs-11-01336-s005.mol
  ChemDraw03101421102D

 24 26  0  0  0  0  0  0  0  0999 V2000
   -0.0780    0.6356    0.0000 C   0  0  0  0  0  0  0  0  0  0  0  0
    0.8089    0.6356    0.0000 C   0  0  0  0  0  0  0  0  0  0  0  0
   -0.0161   -0.8552    0.0000 C   0  0  0  0  0  0  0  0  0  0  0  0
    0.8089   -0.8552    0.0000 C   0  0  0  0  0  0  0  0  0  0  0  0
    1.2214   -0.1407    0.0000 C   0  0  0  0  0  0  0  0  0  0  0  0
   -0.5995    1.1571    0.0000 C   0  0  0  0  0  0  0  0  0  0  0  0
   -0.7306   -1.2677    0.0000 C   0  0  0  0  0  0  0  0  0  0  0  0
   -1.4393    0.9450    0.0000 C   0  0  0  0  0  0  0  0  0  0  0  0
   -2.1405    1.4194    0.0000 C   0  0  0  0  0  0  0  0  0  0  0  0
   -1.5630   -0.9319    0.0000 C   0  0  0  0  0  0  0  0  0  0  0  0
   -2.2849   -1.3031    0.0000 C   0  0  0  0  0  0  0  0  0  0  0  0
   -2.9243   -0.6637    0.0000 C   0  0  0  0  0  0  0  0  0  0  0  0
   -2.8830    0.6769    0.0000 C   0  0  0  0  0  0  0  0  0  0  0  0
   -2.4086    0.0788    0.0000 C   0  0  0  0  0  0  0  0  0  0  0  0
   -1.5836    0.0788    0.0000 C   0  0  0  0  0  0  0  0  0  0  0  0
   -0.5995    1.9821    0.0000 C   0  0  0  0  0  0  0  0  0  0  0  0
   -0.4286   -0.1407    0.0000 O   0  0  0  0  0  0  0  0  0  0  0  0
   -0.3181   -1.9821    0.0000 C   0  0  0  0  0  0  0  0  0  0  0  0
    2.0872    0.0117    0.0000 C   0  0  0  0  0  0  0  0  0  0  0  0
    2.2098    0.8822    0.0000 C   0  0  0  0  0  0  0  0  0  0  0  0
    1.4197    1.2679    0.0000 O   0  0  0  0  0  0  0  0  0  0  0  0
    2.4997   -0.7028    0.0000 C   0  0  0  0  0  0  0  0  0  0  0  0
    2.9243    1.2947    0.0000 O   0  0  0  0  0  0  0  0  0  0  0  0
   -1.3155   -1.7362    0.0000 O   0  0  0  0  0  0  0  0  0  0  0  0
  1  2  1  0      
  3  4  1  0      
  4  5  1  0      
  5  2  1  0      
  1  6  2  0      
  3  7  1  0      
  6  8  1  0      
  8  9  1  0      
  7 10  1  0      
 10 11  1  0      
 11 12  1  0      
  9 13  1  0      
 13 14  2  0      
 12 14  1  0      
 14 15  1  0      
  6 16  1  0      
  3 17  2  0      
  7 18  1  0      
 19 20  1  0      
 20 21  1  0      
  2 21  1  6      
  5 19  1  6      
 19 22  2  0      
 20 23  2  0      
 10 24  1  6      
  7 24  1  6      
M  END
