# Supplementary material for: Immunomodulatory Effect of Marine Cembrane-Type Diterpenoids on Dendritic Cells
Source: MDPI journal article supplement (doi:10.3390/md11041336), 2013-04-22
Supplement: s11 [file s11]

marinedrugs-11-01336-s006.mol
  corina  04151405293D 1   1.00000     0.00000 
CORINA 3.49 0023  12.04.2013
 27 29  0  0  0  0  0  0  0  0999 V2000
    0.1928    1.7132    0.8193 C   0  0  0  0  0  0  0  0  0  0  0  0
    0.3299    0.2162    1.1002 C   0  0  0  0  0  0  0  0  0  0  0  0
   -0.3688   -1.6785   -2.0468 C   0  0  0  0  0  0  0  0  0  0  0  0
    0.1571   -1.6215   -0.6125 C   0  0  0  0  0  0  0  0  0  0  0  0
   -0.6234   -0.5720    0.2000 C   0  0  0  0  0  0  0  0  0  0  0  0
    1.4795    2.5142    0.6047 C   0  0  0  0  0  0  0  0  0  0  0  0
    0.0338   -0.4365   -2.7966 C   0  0  0  0  0  0  0  0  0  0  0  0
    1.4371    3.6833   -0.3812 C   0  0  0  0  0  0  0  0  0  0  0  0
    2.8026    3.8243   -1.0584 C   0  0  0  0  0  0  0  0  0  0  0  0
    0.9885   -0.4922   -3.6930 C   0  0  0  0  0  0  0  0  0  0  0  0
    1.3824    0.7440   -4.4571 C   0  0  0  0  0  0  0  0  0  0  0  0
    2.7159    1.2760   -3.9303 C   0  0  0  0  0  0  0  0  0  0  0  0
    3.0607    2.6105   -1.9138 C   0  0  0  0  0  0  0  0  0  0  0  0
    2.4652    2.4918   -3.0743 C   0  0  0  0  0  0  0  0  0  0  0  0
    1.5282    3.5702   -3.5535 C   0  0  0  0  0  0  0  0  0  0  0  0
    2.8071    1.7579    0.6825 C   0  0  0  0  0  0  0  0  0  0  0  0
    0.7016    2.6216    1.7990 O   0  0  0  0  0  0  0  0  0  0  0  0
   -1.5650   -1.4073    1.0536 C   0  0  0  0  0  0  0  0  0  0  0  0
   -0.0920   -2.9002    0.0406 O   0  0  0  0  0  0  0  0  0  0  0  0
   -1.0995   -2.7951    0.9189 C   0  0  0  0  0  0  0  0  0  0  0  0
   -1.5708   -3.7339    1.5303 O   0  0  0  0  0  0  0  0  0  0  0  0
   -0.6635    0.8707   -2.5204 C   0  0  0  0  0  0  0  0  0  0  0  0
   -2.5962   -0.9720    1.7735 C   0  0  0  0  0  0  0  0  0  0  0  0
   -1.8171   -1.7792   -2.0247 O   0  0  0  0  0  0  0  0  0  0  0  0
   -1.7189   -2.9068   -3.9227 O   0  0  0  0  0  0  0  0  0  0  0  0
   -2.3981   -2.4337   -3.0425 C   0  0  0  0  0  0  0  0  0  0  0  0
   -3.8974   -2.5784   -3.0873 C   0  0  0  0  0  0  0  0  0  0  0  0
  1  2  1  0      
  3  4  1  0      
  4  5  1  0      
  5  2  1  0      
  1  6  1  0      
  3  7  1  0      
  6  8  1  0      
  8  9  1  0      
  7 10  2  0      
 10 11  1  0      
 11 12  1  0      
  9 13  1  0      
 13 14  2  0      
 12 14  1  0      
 14 15  1  0      
  6 16  1  0      
  6 17  1  0      
  1 17  1  0      
  5 18  1  0      
  4 19  1  0      
 19 20  1  0      
 18 20  1  0      
 20 21  2  0      
  7 22  1  0      
 18 23  2  0      
  3 24  1  0      
 24 26  1  0      
 25 26  2  0      
 26 27  1  0      
M  STY  1   1 SUP
M  SLB  1   1   1
M  SAL   1  4  24  25  26  27
M  SBL   1  1  26
M  SMT   1 OAc
M  SBV   1 26   -7.7917    4.8168
M  END
$$$$
