# Supplementary material for: Immunomodulatory Effect of Marine Cembrane-Type Diterpenoids on Dendritic Cells
Source: MDPI journal article supplement (doi:10.3390/md11041336), 2013-04-22
Supplement: s12 [file s12]

marinedrugs-11-01336-s006.mol
  ChemDraw03101421102D

 27 29  0  0  0  0  0  0  0  0999 V2000
   -0.1332    0.7050    0.0000 C   0  0  0  0  0  0  0  0  0  0  0  0
    0.7536    0.7050    0.0000 C   0  0  0  0  0  0  0  0  0  0  0  0
   -0.0714   -0.7858    0.0000 C   0  0  0  0  0  0  0  0  0  0  0  0
    0.7536   -0.7858    0.0000 C   0  0  0  0  0  0  0  0  0  0  0  0
    1.1661   -0.0714    0.0000 C   0  0  0  0  0  0  0  0  0  0  0  0
   -0.6547    1.2265    0.0000 C   0  0  0  0  0  0  0  0  0  0  0  0
   -0.7858   -1.1983    0.0000 C   0  0  0  0  0  0  0  0  0  0  0  0
   -1.4945    1.0143    0.0000 C   0  0  0  0  0  0  0  0  0  0  0  0
   -2.1957    1.4887    0.0000 C   0  0  0  0  0  0  0  0  0  0  0  0
   -1.6182   -0.8625    0.0000 C   0  0  0  0  0  0  0  0  0  0  0  0
   -2.3401   -1.2338    0.0000 C   0  0  0  0  0  0  0  0  0  0  0  0
   -2.9795   -0.5944    0.0000 C   0  0  0  0  0  0  0  0  0  0  0  0
   -2.9382    0.7462    0.0000 C   0  0  0  0  0  0  0  0  0  0  0  0
   -2.4639    0.1481    0.0000 C   0  0  0  0  0  0  0  0  0  0  0  0
   -1.6389    0.1481    0.0000 C   0  0  0  0  0  0  0  0  0  0  0  0
   -0.8682    2.0233    0.0000 C   0  0  0  0  0  0  0  0  0  0  0  0
    0.1422    1.4400    0.0000 O   0  0  0  0  0  0  0  0  0  0  0  0
    1.9911   -0.0714    0.0000 C   0  0  0  0  0  0  0  0  0  0  0  0
    1.4681   -1.1983    0.0000 O   0  0  0  0  0  0  0  0  0  0  0  0
    2.2650   -0.9848    0.0000 C   0  0  0  0  0  0  0  0  0  0  0  0
    2.9795   -1.3973    0.0000 O   0  0  0  0  0  0  0  0  0  0  0  0
   -0.7858   -2.0233    0.0000 C   0  0  0  0  0  0  0  0  0  0  0  0
    2.5745    0.5120    0.0000 C   0  0  0  0  0  0  0  0  0  0  0  0
   -0.6348   -0.6340    0.0000 O   0  0  0  0  0  0  0  0  0  0  0  0
   -1.3493    0.6035    0.0000 O   0  0  0  0  0  0  0  0  0  0  0  0
   -1.3493   -0.2215    0.0000 C   0  0  0  0  0  0  0  0  0  0  0  0
   -2.0638   -0.6340    0.0000 C   0  0  0  0  0  0  0  0  0  0  0  0
  1  2  1  0      
  3  4  1  0      
  4  5  1  0      
  5  2  1  0      
  1  6  1  0      
  3  7  1  0      
  6  8  1  0      
  8  9  1  0      
  7 10  2  0      
 10 11  1  0      
 11 12  1  0      
  9 13  1  0      
 13 14  2  0      
 12 14  1  0      
 14 15  1  0      
  6 16  1  6      
  6 17  1  1      
  1 17  1  1      
  5 18  1  6      
  4 19  1  1      
 19 20  1  0      
 18 20  1  0      
 20 21  2  0      
  7 22  1  0      
 18 23  2  0      
  3 24  1  6      
 24 26  1  0      
 25 26  2  0      
 26 27  1  0      
M  STY  1   1 SUP
M  SLB  1   1   1
M  SAL   1  4  24  25  26  27
M  SBL   1  1  26
M  SMT   1 OAc
M  SBV   1 26   -7.7917    4.8168
M  END
